# Supplementary material
Source: Springer Nature journal article supplement (https://www.springermedizin.de/resource/supplementary/13046_2010_355_MOESM5_ESM.pdf/9661840)

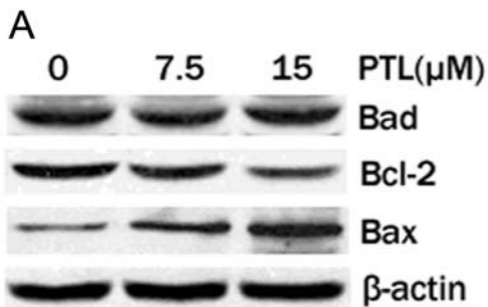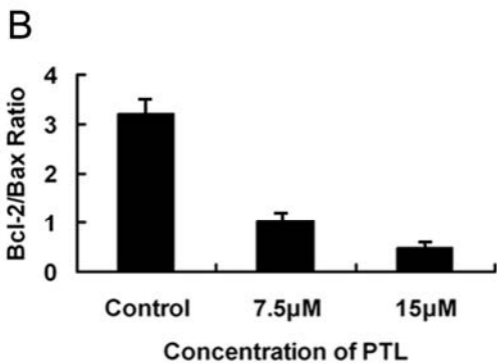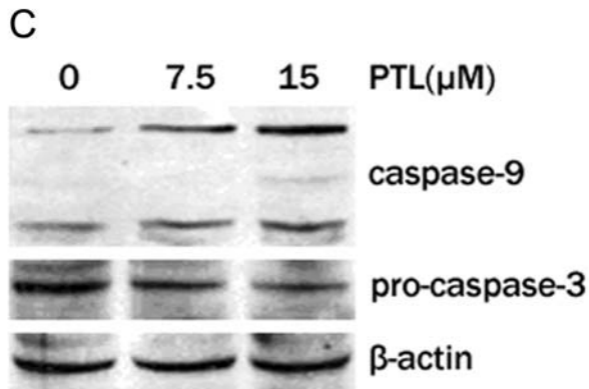

Supplement: MOESM5 [file 9661840]
